# Supplementary material for: Identification of novel potential biomarkers in hepatocarcinoma cancer; a transcriptome analysis
Source: Research Square preprint supplement (doi:10.21203/rs.3.rs-154350/v3), 2021-03-02
Supplement: Supplementary file 1 [file 3371c5254f7aa1b18fb50325.xlsx]

## Sheet: GO terms
Category	Term	Count	P-value	FDR
Biological Process (BP)
	GO:0055114~oxidation-reduction process	60	9.8804e-16	1.77636e-12
	GO:0019373~epoxygenase P450 pathway	12	5.32558e-13	9.44889e-10
	GO:0042738~exogenous drug catabolic process	8	1.69896e-08	3.01429e-05
	GO:0008202~steroid metabolic process	12	4.79999e-08	8.51612e-05
	GO:0017144~drug metabolic process	10	6.41225e-08	0.000113766
	GO:0006805~xenobiotic metabolic process	15	9.23432e-08	0.000163835
	GO:0097267~omega-hydroxylase P450 pathway	6	3.02828e-06	0.00537263
	GO:0006569~tryptophan catabolic process	6	3.02828e-06	0.00537263
	GO:0042493~response to drug	26	8.00345e-06	0.0141988
	GO:0051301~cell division	28	1.13333e-05	0.0201056
Molecular Function (MF)
	GO:0019825~oxygen binding	16	3.58731e-12	5.58451e-09
	GO:0005506~iron ion binding	25	2.89338e-11	4.5042e-08
	GO:0016705~oxidoreductase activity, acting on paired donors, with incorporation or reduction of molecular oxygen	16	7.98801e-11	1.24351e-07
	GO:0004497~monooxygenase activity	16	1.04812e-10	1.63163e-07
	GO:0020037~heme binding	22	7.82703e-10	1.21845e-06
	GO:0008392~arachidonic acid epoxygenase activity	9	3.29902e-09	5.13565e-06
	GO:0008395~steroid hydroxylase activity	10	3.60913e-08	5.61841e-05
	GO:0016491~oxidoreductase activity	23	1.56026e-07	0.00024289
	GO:0070330~aromatase activity	9	8.28262e-07	0.00128937
	GO:0009055~electron carrier activity	14	2.70095e-06	0.00420455
	GO:0016712~oxidoreductase activity, acting on paired donors, with incorporation or reduction of molecular oxygen, reduced flavin or flavoprotein as one donor, and incorporation of one atom of oxygen	7	2.79921e-06	0.00435751
	GO:0015171~amino acid transmembrane transporter activity	10	8.98557e-06	0.0139871
Cellular Components (CC)
	GO:0070062~extracellular exosome	152	1.98021e-14	2.71783e-11
	GO:0031090~organelle membrane	21	6.51417e-13	8.95695e-10
	GO:0005615~extracellular space	80	2.6786e-09	3.68333e-06
	GO:0000777~condensed chromosome kinetochore	13	9.00263e-06	0.0123787
	GO:0072562~blood microparticle	17	1.10137e-05	0.0151438
	GO:0005829~cytosol	138	1.15903e-05	0.0159365
	GO:0005576~extracellular region	78	1.44625e-05	0.0198854
	GO:0030496~midbody	15	2.7458e-05	0.0377506

## Sheet: Pathways
Term	Pathways	P-value	FDR
hsa01100	Metabolic pathways	9.18913e-10	1.18765e-06
hsa05204	Chemical carcinogenesis	6.6773e-08	8.63005e-05
hsa00830	Retinol metabolism	1.38594e-07	0.000179125
hsa04110	Cell cycle	3.38399e-07	0.000437362
hsa04115	p53 signaling pathway	1.68888e-06	0.00218276
hsa01130	Biosynthesis of antibiotics	2.93823e-06	0.00379744
hsa00980	Metabolism of xenobiotics by cytochrome P450	5.42865e-06	0.00701602
hsa03320	PPAR signaling pathway	1.01993e-05	0.0131813
hsa00982	Drug metabolism - cytochrome P450	1.19531e-05	0.0154476
hsa00260	Glycine, serine and threonine metabolism	1.59007e-05	0.0205489
hsa01230	Biosynthesis of amino acids	2.18822e-05	0.028278
